# Supplementary material for: Electric impedance microflow cytometry for characterization of cell disease states
Source: Royal Society of Chemistry journal article supplement (doi:10.1039/c3lc50540e), 2013-01-01
Supplement: c3lc50540e.pdf [file c3lc50540e.pdf]

## Electronic Supplementary Information

### Electric Impedance Microflow Cytometry for Disease-State Characterization and Diagnostics†

E Du<sup>‡a</sup>, Sungjae Ha<sup>‡b</sup>, Monica Diez-Silva<sup>a</sup>, Ming Dao<sup>\*a</sup>, Subra Suresh<sup>a</sup>, Anantha P. Chandrakasan<sup>\*b</sup>

<sup>a</sup> Department of Materials Science and Engineering, Massachusetts Institute of Technology, 77 Massachusetts Avenue., Cambridge, MA 02139, USA;  
E-mail: mingdao@mit.edu

<sup>b</sup> Department of Electrical Engineering and Computer Science, Massachusetts Institute of Technology, 77 Massachusetts Avenue., Cambridge, MA 02139, USA;  
E-mail: anantha@mit.edu

‡ These authors contributed equally to this work.

### Supplementary Figures

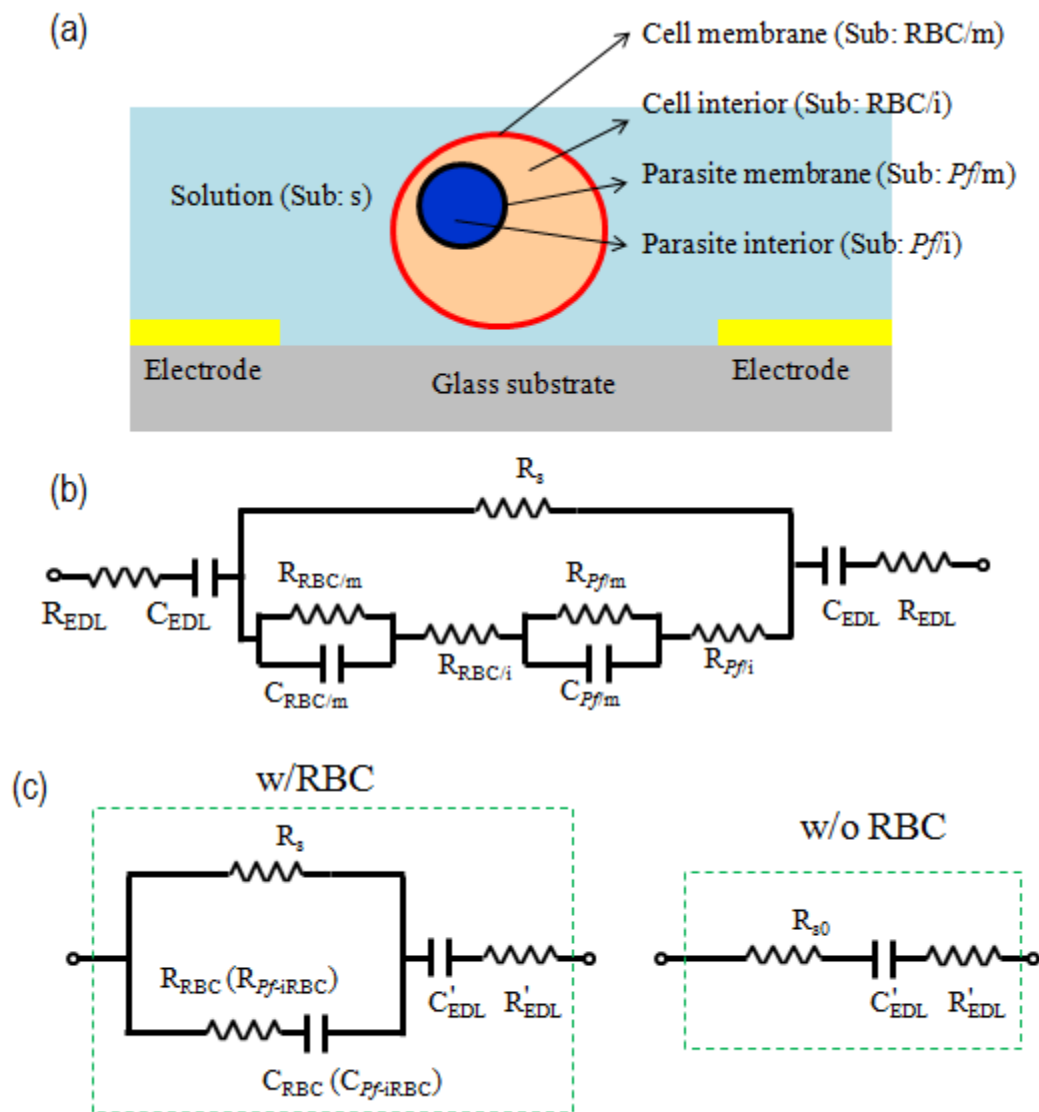

**Fig.S1** (a) Schematic of a *Pf*-iRBC suspended in solution between two electrodes. (b) Equivalent complete circuit model of single *Pf*-iRBC suspended between two electrodes. (c) Unitary circuit model of single *Pf*-iRBC suspended between two electrodes (assume the effects of presence of cell on medium resistance change is ignorable:  $R_s \approx R_{s0}$ ).

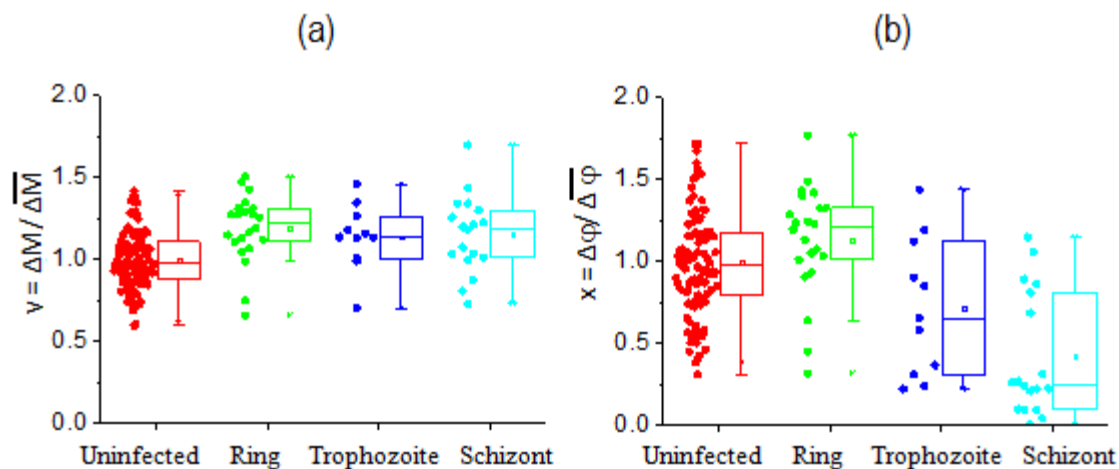

**Fig.S2** (a) Scatter plot of normalized magnitude transition for uninfected RBCs and *Pf*-iRBCs in 0.5% w/v BSA-PBS. (b) Scatter plot of normalized phase transition for uninfected RBCs and *Pf*-iRBCs in 0.5% w/v BSA-PBS.

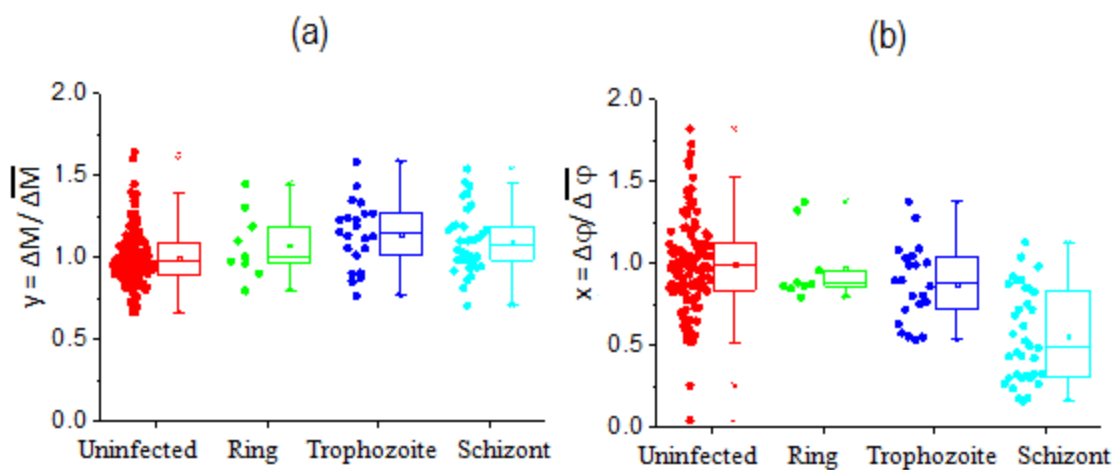

**Fig.S3** (a) Scatter plot of normalized magnitude transition for uninfected RBCs and *Pf*-iRBCs in 1% w/v BSA-PBS. (b) Scatter plot of normalized phase transition for uninfected RBCs and *Pf*-iRBCs in 1% w/v BSA-PBS.

## Supplementary Tables

**Table S1** Descriptive statistics of EI transitions of individual cells for different BSA concentrations (N: uninfected RBCs; R: ring stage; T: trophozoite stage; S: schizont stage).

| Condition<br>EI transition | 0.2 % w/v BSA-PBS  |        |       | 0.5% w/v BSA-PBS   |        |        | 1 % w/v BSA-PBS    |        |        |
|----------------------------|--------------------|--------|-------|--------------------|--------|--------|--------------------|--------|--------|
|                            | Population (count) | Mean   | S.D.  | Population (count) | Mean   | S.D.   | Population (count) | Mean   | S.D.   |
| Mag ( $\Omega$ )           | N (120)            | 379.92 | 43.48 | N (120)            | 385.27 | 81.15  | N (120)            | 458.58 | 133.75 |
| Pha (rad)                  |                    | -0.13  | 0.03  |                    | -0.12  | 0.03   |                    | -0.24  | 0.13   |
| Mag ( $\Omega$ )           | R (9)              | 433.33 | 43.19 | R (22)             | 450.87 | 78.05  | R (15)             | 660.40 | 126.70 |
| Pha (rad)                  |                    | -0.14  | 0.03  |                    | -0.12  | 0.03   |                    | -0.25  | 0.06   |
| Mag ( $\Omega$ )           | T (22)             | 459.34 | 65.10 | T (13)             | 451.36 | 84.38  | T (16)             | 684.38 | 121.56 |
| Pha (rad)                  |                    | -0.13  | 0.05  |                    | -0.09  | 0.03   |                    | -0.21  | 0.07   |
| Mag ( $\Omega$ )           | S (36)             | 505.22 | 92.98 | S (26)             | 403.48 | 113.91 | S (11)             | 408.69 | 68.19  |
| Pha (rad)                  |                    | -0.11  | 0.07  |                    | -0.05  | 0.02   |                    | -0.13  | 0.14   |

**Table S2** Statistical significance of detection parameters for uninfected RBCs and *Pf*-iRBCs in 0.2% w/v BSA-PBS (N: uninfected RBCs; R: ring stage; T: trophozoite stage; S: schizont stage).

| Offset $\delta$ |          |          |          | Normalized magnitude transition Y |          |          | Normalized phase transition X |         |          |          |          |
|-----------------|----------|----------|----------|-----------------------------------|----------|----------|-------------------------------|---------|----------|----------|----------|
| P-value         | R        | T        | S        | P-value                           | R        | T        | S                             | P-value | R        | T        | S        |
| N               | 1.27E-07 | 1.08E-08 | 5.09E-06 | N                                 | 2.79E-04 | 1.94E-04 | 1.17E-03                      | N       | 4.13E-01 | 9.12E-01 | 5.00E-01 |
| R               |          | 5.88E-04 | 1.09E-04 | R                                 |          | 1.99E-01 | 3.29E-02                      | R       |          | 5.44E-01 | 3.35E-01 |
| T               |          |          | 4.63E-03 | T                                 |          |          | 1.76E-01                      | T       |          |          | 5.90E-01 |

**Table S3** Statistical significance of detection parameters for uninfected RBCs and *Pf*-iRBCs in 0.5% w/v BSA-PBS. (N: uninfected RBCs; R: ring stage; T: trophozoite stage; S: schizont stage).

| Offset $\delta$ |          |          |          | Normalized magnitude transition Y |          |          | Normalized phase transition X |         |          |          |          |
|-----------------|----------|----------|----------|-----------------------------------|----------|----------|-------------------------------|---------|----------|----------|----------|
| P-value         | R        | T        | S        | P-value                           | R        | T        | S                             | P-value | R        | T        | S        |
| N               | 1.25E-07 | 1.21E-04 | 1.60E-06 | N                                 | 4.43E-04 | 4.65E-02 | 1.64E-04                      | N       | 1.06E-01 | 5.21E-02 | 3.71E-06 |
| R               |          | 1.17E-02 | 1.20E-04 | R                                 |          | 5.08E-01 | 6.30E-01                      | R       |          | 1.11E-02 | 4.10E-07 |
| T               |          |          | 4.94E-02 | T                                 |          |          | 8.50E-01                      | T       |          |          | 6.71E-02 |

**Table S4** Statistical significance of detection parameters for uninfected RBCs and *Pf*-iRBCs in 1% w/v BSA-PBS. (N: uninfected RBCs; R: ring stage; T: trophozoite stage; S: schizont stage).

| Offset $\delta$ |          |          |          | Normalized magnitude transition Y |          |          | Normalized phase transition X |         |          |          |          |
|-----------------|----------|----------|----------|-----------------------------------|----------|----------|-------------------------------|---------|----------|----------|----------|
| P-value         | R        | T        | S        | P-value                           | R        | T        | S                             | P-value | R        | T        | S        |
| N               | 1.34E-01 | 3.17E-07 | 1.36E-08 | N                                 | 3.06E-01 | 4.93E-03 | 8.96E-03                      | N       | 7.58E-01 | 3.46E-02 | 2.42E-11 |
| R               |          | 9.22E-02 | 7.85E-03 | R                                 |          | 4.41E-01 | 7.99E-01                      | R       |          | 2.67E-01 | 1.87E-04 |
| T               |          |          | 7.12E-02 | T                                 |          |          | 4.09E-01                      | T       |          |          | 2.38E-05 |
